# Supplementary material for: Differential network entropy reveals cancer system hallmarks
Source: PubMed Central journal article supplement — Sci Rep. 2012 Nov 13;2:802. doi: 10.1038/srep00802 (PMC3496163; doi:10.1038/srep00802), 2012-11-13
Supplement: srep00802-s1.pdf [file srep00802-s1.pdf]

## SUPPLEMENTARY INFORMATION FILE

### Differential network entropy reveals cancer system hallmarks

James West<sup>1,2</sup>, Ginestra Bianconi<sup>3</sup>, Simone Severini<sup>2</sup> & Andrew E Teschendorff<sup>1</sup>

<sup>1</sup> Statistical Cancer Genomics, Paul O’Gorman Building, UCL Cancer Institute, University College London, 72 Huntley Street, London WC1E 6BT, United Kingdom.

<sup>2</sup> Department of Computer Science and Department of Physics & Astronomy, University College London, London WC1E 6BT, United Kingdom.

<sup>3</sup> Department of Physics, Northeastern University, Boston, Massachusetts 02115, USA.

#### SUPPLEMENTARY FIGURES:

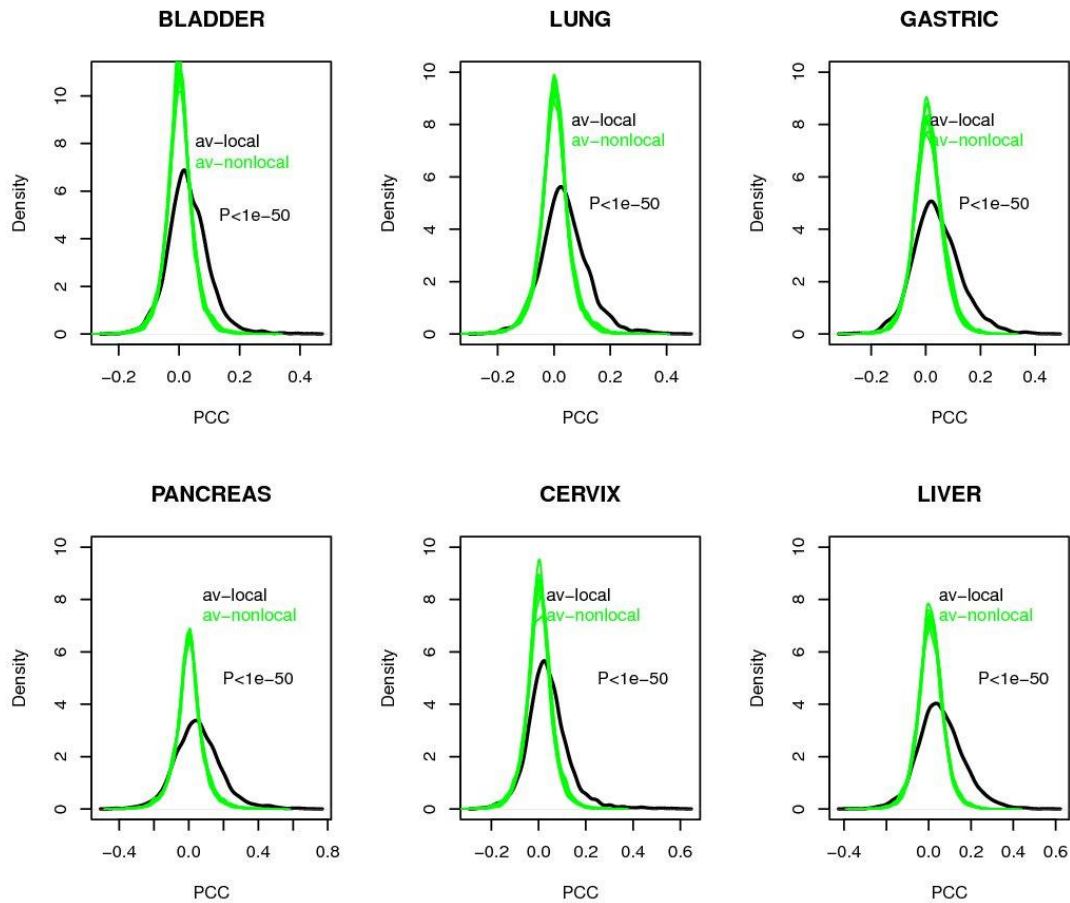

**Supp.Fig.1:** Densities of average local and non-local Pearson Correlation Coefficients (PCC), for each tissue type, where correlations were estimated only over normal samples. Wilcoxon rank sum test P-value between the local and non-local distributions is given. In the local case, averages are taken over the correlations with neighbors of a given node, in the non-local case, the average is taken over a randomly selected number of nodes.

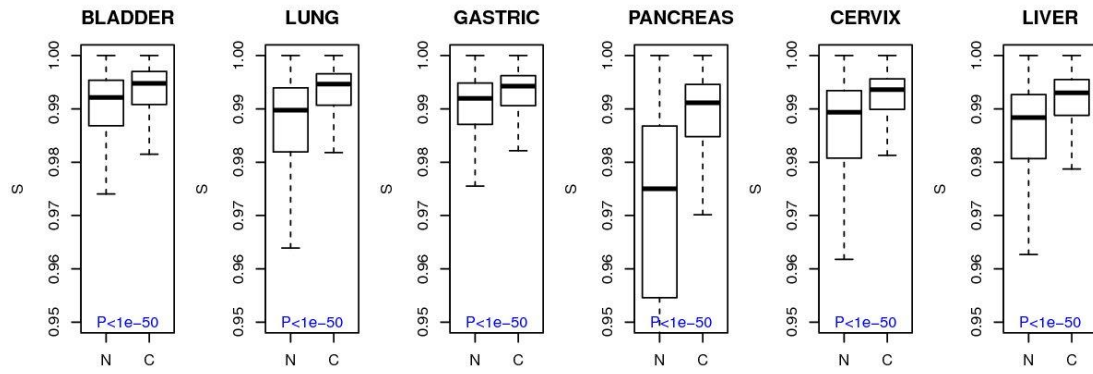

**Supp.Fig.2:** Local network entropy boxplots for normal (N) and cancer (C) tissue, using all nodes of degree at least 2. Wilcoxon rank sum test P-values are given.

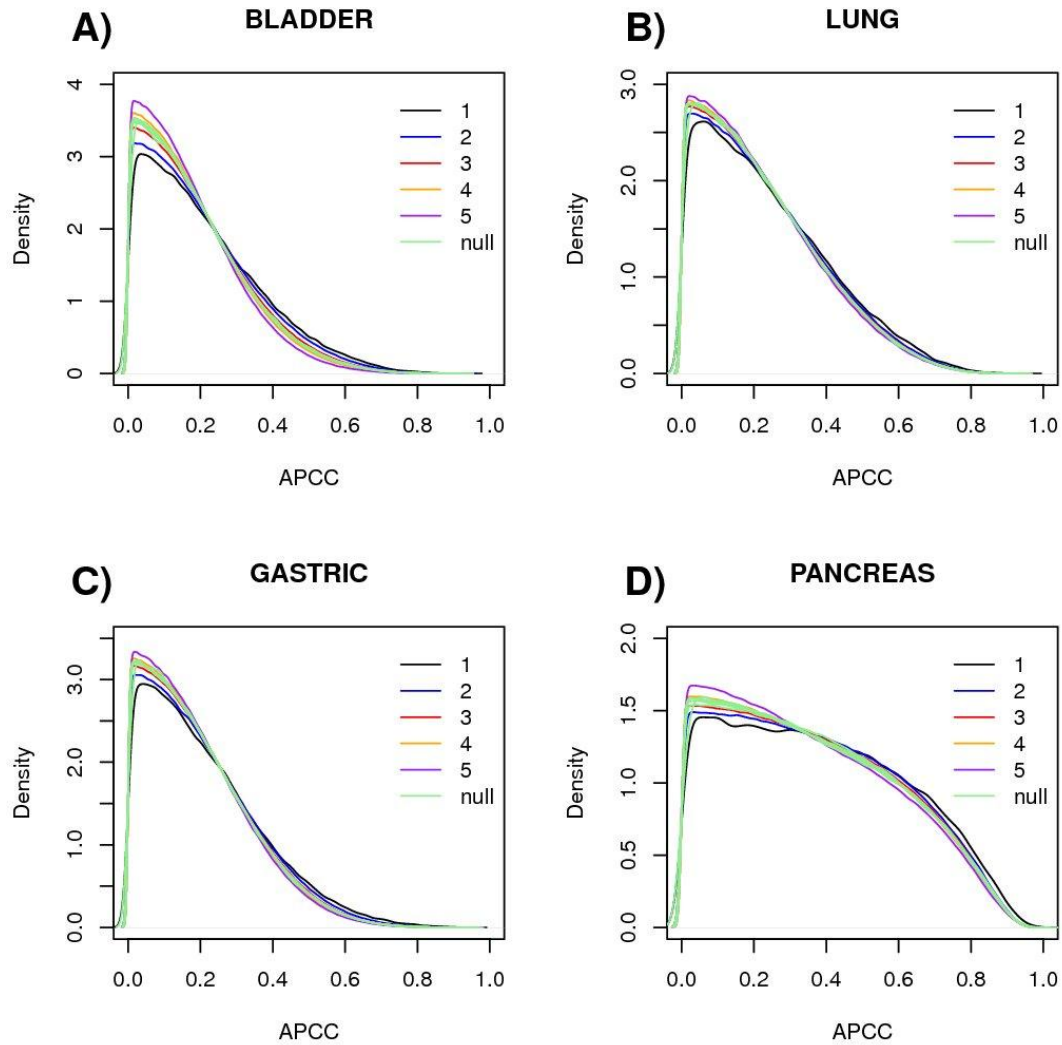

**Supp.Fig.3:** Densities of the average of absolute Pearson Correlation Coefficients (APCC) for nodes at path length distances 1,2,3,4,5 and for the case of randomly selected nodes (NULL). Averages are taken over nodes in a shell with path length distance “d” away from a given node. Observe that the strength of correlations is not stronger than random at distances beyond path length distance 3.

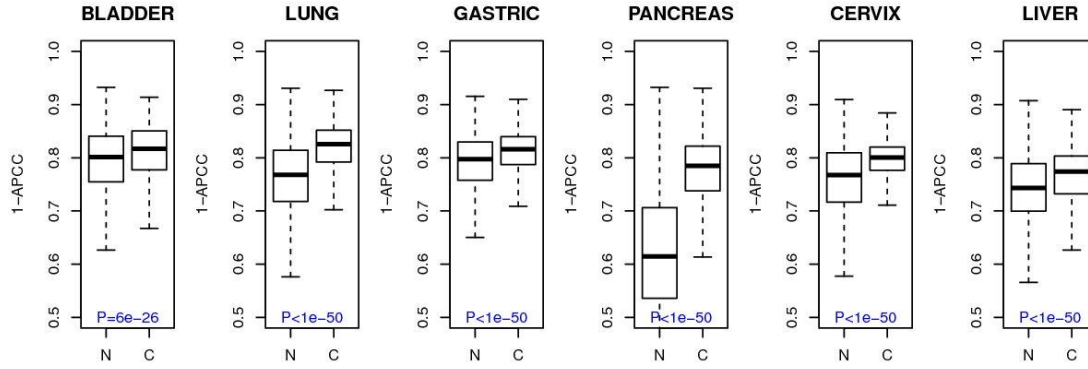

**Supp.Fig.4:** Boxplots of 1-APCC comparing normal (N) and cancer (C) tissue, where APCC is the average of Absolute Pearson Correlation Coefficients over the neighbors of a given node. Wilcoxon-rank sum test P-values are given.

**SUPPLEMENTARY TABLES:**

|                                 | BLADDER | LUNG   | GASTRIC | PANCREAS  | CERVIX | LIVER  |
|---------------------------------|---------|--------|---------|-----------|--------|--------|
| PCC: $z(dS) \sim k$             | 0.048   | 0.076  | 0.169   | 0.077     | 0.078  | 0.077  |
| Pval: $z(dS) \sim k$            | 0.54    | 0.101  | 0.085   | 0.01      | 0.302  | 0.339  |
| PCC: $z(dS) \sim t(dE)$         | -0.34   | -0.026 | -0.26   | -0.129    | -0.201 | -0.14  |
| Pval: $z(dS) \sim t(dE)$        | 7.2E-06 | 0.568  | 0.007   | 0.000013  | 0.007  | 0.083  |
| PCC: $z(dS) \sim t(dE) \mid k$  | -0.351  | -0.042 | -0.288  | -0.138    | -0.203 | -0.155 |
| Pval: $z(dS) \sim t(dE) \mid k$ | 1.7E-06 | 0.363  | 0.002   | 0.0000027 | 0.006  | 0.054  |

**Supp.Table.1:** Analysis results of the Pearson Correlation Coefficient (PCC) and associated P-value (Pval) between the z-statistics of differential entropy ( $z(dS)$ ), and node degree ( $k$ ), between  $z(dS)$  and the t-statistics of differential expression ( $t(dE)$ ), as well as their partial correlation analysis after adjustment for node degree (last two rows). These results were estimated over all nodes of degree at least 2 in the network.

| EntrezID | Symbol   | dS       | $z(dS)$  | Pval(dS) | k   | t           | Pval(t)  |
|----------|----------|----------|----------|----------|-----|-------------|----------|
| 9212     | AURKB    | -0.00817 | -4.86765 | 1.13E-06 | 149 | 9.057115247 | 1.62E-15 |
| 7083     | TK1      | -0.00793 | -4.60117 | 4.2E-06  | 73  | 9.409416085 | 2.2E-16  |
| 991      | CDC20    | -0.00787 | -4.51719 | 6.27E-06 | 50  | 13.01819497 | 2.18E-25 |
| 55143    | CDCA8    | -0.01623 | -4.06792 | 4.74E-05 | 26  | 10.29751892 | 1.37E-18 |
| 4605     | MYBL2    | -0.00938 | -3.71224 | 0.000205 | 39  | 6.320989653 | 3.75E-09 |
| 9368     | SLC9A3R1 | -0.00687 | -3.43271 | 0.000598 | 111 | 7.060170278 | 8.71E-11 |
| 3833     | KIFC1    | -0.00804 | -3.42213 | 0.000621 | 48  | 9.197113437 | 7.34E-16 |
| 9470     | EIF4E2   | -0.00664 | -3.41819 | 0.00063  | 114 | 2.674718246 | 0.008431 |
| 2584     | GALK1    | -0.00646 | -3.4059  | 0.000659 | 85  | 3.763568175 | 0.000252 |
| 891      | CCNB1    | -0.00756 | -3.31125 | 0.000929 | 93  | 10.59157164 | 2.53E-19 |
| 9055     | PRC1     | -0.02509 | -3.30762 | 0.000941 | 10  | 11.09346785 | 1.4E-20  |
| 4171     | MCM2     | -0.0055  | -3.29924 | 0.000969 | 84  | 11.18909017 | 8.08E-21 |
| 6790     | AURKA    | -0.00538 | -3.20844 | 0.001335 | 170 | 11.95116679 | 9.97E-23 |
| 6712     | SPTBN2   | -0.00787 | -3.17602 | 0.001493 | 55  | 6.490703789 | 1.61E-09 |

|       |          |          |          |          |     |             |          |
|-------|----------|----------|----------|----------|-----|-------------|----------|
| 9133  | CCNB2    | -0.00847 | -3.15285 | 0.001617 | 56  | 12.54615189 | 3.26E-24 |
| 3619  | INCENP   | -0.00806 | -3.12461 | 0.00178  | 25  | 3.204347762 | 0.0017   |
| 5058  | PAK1     | -0.00415 | -3.10923 | 0.001876 | 140 | 0.03973053  | 0.968368 |
| 1457  | CSNK2A1  | -0.00309 | -3.10518 | 0.001902 | 335 | 6.708130371 | 5.35E-10 |
| 9136  | RRP9     | -0.00887 | -3.10413 | 0.001908 | 40  | 1.197651363 | 0.233212 |
| 3007  | HIST1H1D | -0.00467 | -2.9859  | 0.002827 | 76  | 0.559287628 | 0.576919 |
| 54821 | ERCC6L   | -0.00701 | -2.89831 | 0.003752 | 22  | 5.56733345  | 1.4E-07  |
| 1468  | SLC25A10 | -0.0085  | -2.89238 | 0.003823 | 57  | 6.051434387 | 1.41E-08 |
| 51203 | NUSAP1   | -0.01353 | -2.85238 | 0.004339 | 12  | 8.258984683 | 1.39E-13 |
| 4288  | MKI67    | -0.00991 | -2.8428  | 0.004472 | 42  | 10.74021532 | 1.08E-19 |
| 55379 | LRRC59   | -0.00523 | -2.81197 | 0.004924 | 151 | 5.707930826 | 7.27E-08 |
| 55388 | MCM10    | -0.00595 | -2.73769 | 0.006187 | 25  | 7.654668699 | 3.73E-12 |
| 54472 | TOLLIP   | -0.01066 | -2.70455 | 0.00684  | 14  | 3.748152238 | 0.000266 |
| 3014  | H2AFX    | -0.00462 | -2.70379 | 0.006855 | 125 | 3.739550202 | 0.000274 |
| 3337  | DNAJB1   | -0.00445 | -2.7001  | 0.006932 | 63  | 2.222799962 | 0.027942 |
| 9111  | NMI      | -0.01127 | -2.69927 | 0.006949 | 16  | 4.155352214 | 5.82E-05 |
| 1063  | CENPF    | -0.00546 | -2.65616 | 0.007904 | 59  | 11.01365715 | 2.22E-20 |
| 990   | CDC6     | -0.00691 | -2.63315 | 0.00846  | 23  | 9.907525167 | 1.29E-17 |
| 55720 | TSR1     | -0.00373 | -2.57361 | 0.010064 | 48  | 3.995260524 | 0.000107 |

**Supp.Table.2:** We list the top ranked genes showing the largest reductions in network entropy in bladder cancer compared to normal tissue. We provide the EntrezID, Gene Symbol, the differential entropy change, the associated z-statistic and P-value, the node degree, the t-statistic and associated P-value of differential expression.
